# Supplementary material
Source: publisher site journal article supplement (https://www.dovepress.com/article/210404)
Supplement: Supplementary file 1 [file get_supplementary_file.php]

**Table S1. List of feasibility and open-ended qualitative questions**

---

**Five point Likert scale questions (Strongly agree; Agree; Neutral; Disagree; Strongly disagree):**

---

1. You would prefer a self-administered questionnaire over a counsellor or social worker administered one? In other words, fill the answers in yourself without a counsellor or social worker present.
2. You would prefer an electronic questionnaire on a tablet or smartphone instead of a paper form?
3. You are comfortable with using a smartphone or tablet?
4. I am concerned that my information will not be confidential if I answer questions on a tablet or smartphone?
5. Overall, you liked answering the questions yourself on a tablet or smartphone?\*
6. The tablet was easy to use and the questionnaire easy to complete?\*

---

**Open-ended questions:**

---

1. What do you like about the adherence counselling that you receive from counsellors or social workers at this clinic?
2. What do you dislike about the adherence counselling that you receive from counsellors or social workers at this clinic?
3. Are there ways we could make adherence counselling better? Be as specific as possible?
4. Would/Did you prefer to complete a questionnaire that asks you if you have been taking your medication, on your own and in the absence of a counsellor or social worker? Please answer Yes or No and then explain why you selected Yes or No.
5. What did you dislike about using the tablet to complete the adherence questionnaire? Be as specific as possible?\*
6. What did you like about using the tablet to complete the adherence questionnaire? Be as specific as possible?\*
7. Did you find the tablet easy to use? Did you have any trouble using it? If yes, what trouble did you have?\*
8. Is there anything else you would like to tell us?

---

*\*Only completed among patients who were randomized to complete an electronic-adherence questionnaire*
